# Supplementary material for: A Unique Role for the Host ESCRT Proteins in Replication of Tomato bushy stunt virus
Source: PubMed Central journal article supplement (PMC2791863; doi:10.1371/journal.ppat.1000705), 2009-12-24

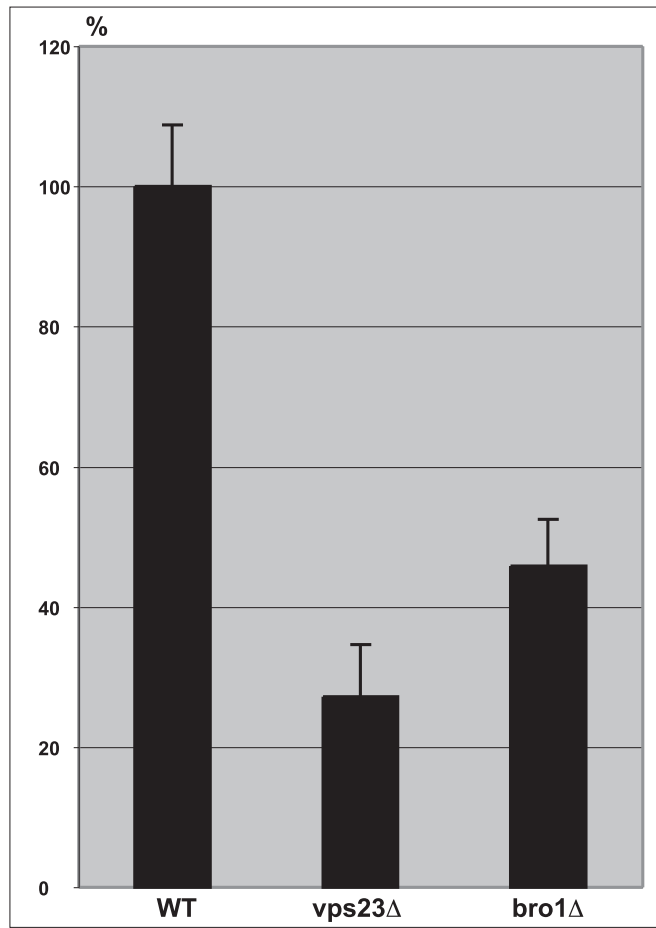

Supplement: ppat.1000705.s003.pdf [file ppat.1000705.s003.pdf]
