# Supplementary material for: A Unique Role for the Host ESCRT Proteins in Replication of Tomato bushy stunt virus
Source: PubMed Central journal article supplement (PMC2791863; doi:10.1371/journal.ppat.1000705), 2009-12-24
Supplement: ppat.1000705.s005.pdf [file ppat.1000705.s005.pdf]

**Table S1. List of primers used in this study**

|       |                                                               |
|-------|---------------------------------------------------------------|
| 0532  | GGCGGGATCCGGAAATTCCTCCAGGATTTCTC                              |
| 0313  | CCCAACAAGAGTAACCTGTATGCTATGCCA                                |
| 0720  | CCCGCTCGAGGGGCTGCATTTCTGCAATGTTCC                             |
| 0952  | CCCGCTCGAGTCATGCTACGGCGGAGTCAAGGA                             |
| 0992B | GAGCTGCAGCTATTTACACCAAGGGA                                    |
| 1069  | CCGGTTCGAGCTCTACCAGGTAATATACCACAACGTGTGT                      |
| 1277  | CGGCAAGCTTACCATGTCATCCACAGCAGTACCACGA                         |
| 1278  | CGGGCTCGAGGTGTGTACGCGTTTCATCATCAACA                           |
| 1403  | GCCGCTCGAGCTATTTACACCAAGGGACTCA                               |
| 1794  | GCGGGATCCATGGATACCATCAAGAGGATG                                |
| 2046  | CGACCTCGAGTCAGCTAGCCGATAACGGTGAGGTGATTTCG                     |
| 2053  | GTCCTCGAGGGATCCATGAAACCTTACTTATTTGACCTAA                      |
| 2054  | GACCTCGAGCTAGCTAGCACTGTGTATTGGAGTACATATT                      |
| 2252  | GCCGAATTCATGTCTGCAAACGGCAAGATCTCTG                            |
| 2292  | GTCCTCGAGTTAGCTAGCCAATGGCGGTTTTAGGTGTGG                       |
| 2446  | AATAAGAAGTTCATGATATCGAACGATTTAATCGTGGGTTGAGGCCCTTTCGTCTTCAAG  |
| 2447  | TTTCATGTACACAAGAAATCTACATTAGCAGTAAATCAATTGAAGCTCTAATTTGTGAG   |
| 2450  | GGCAAGCTTACCATGGGTTCGGGATTACAAGGAC                            |
| 2491  | TATTTTTATGGCACTTCGGCGATGCGAAAAGAAAGTGAGTCAATCGATGAATTCGAGCTC  |
| 2492  | ACTGCCCCAAAGCCCAAGTCTCCACACCTAAAACCGCCATTGCGTACGCTGCAGGTTCGA  |
| 2493  | ACCCTCTGTTTTTGATGAAAATATGTACTCCAAATACAGCAGTCGTACGCTGCAGGTTCGA |
| 2494  | AAAAAAGCTACAATAAAATTAAGAAATAAGAAATGCACCTAATCGATGAATTCGAGCTC   |
| 2663  | GCGGATCCGCTAGCGGCGCCGGTGGAGTGGCG                              |
| 2669  | GCGGATCCGAATTCGGATGGTTCGGGCGCCGTC                             |
| 2670  | GCCGAGCTCGTCGACTCAGAACGGTCTAGGCAATGAC                         |
| 2671  | GCCGAGCTCGTCGACTCATGAATGTAACCTACCTGC                          |
| 2691  | CGGAGATCTATGGCCTCCTCCGAGGAC                                   |
| 2746  | GCGAATTCGGATCCATGGGTTCATCATCATCATCATTACAGCAATTTCAAGGAACAAG    |
| 2747  | GCGGATCCGCTAGCTATTTGGGTAAGGCTGTTGC                            |
| 2748  | CGGCTCGAGGCTAGCTCCTGTTCCAGGAGGCCCA                            |
| 2749  | CGGCTCGAGGAGCTCTCAACCTTCTTCTCCAAACTC                          |
| 2750  | GGCGAATTCGGATCCACCATGGGTTCATCATCATCATCATCATGTTCCCCCGCGTCTA    |
| 2753  | GCCGCTAGCGACATTTGGGCGCTATACGT                                 |
| 2843  | GGCGAATTCGGATCCATGGGTTCATCATCATCATCATCGACCTCCTTCGGCTGA        |
| 2844  | GGCGAATTCGGATCCATGGGTTCATCATCATCATCATCATCCTTCGATCGGATCTGGA    |
| 2845  | GCCGAGCTCGTCGACTCACAATGCAACCTAGCTG                            |
| 2846  | CGCGGATCCATGGGTTCATCATCATCATCATATGGAGAGAGTGATGAACATC          |
| 2847  | GCCGTCGACTCAAGCATTGTCAATGGCCTCATTC                            |
| 2850  | CGCGGATCCATGGGTTCATCATCATCATCATATGTTTATGAATCGGCTATTTCG        |
| 2851  | GCCGAGCTCGTCGACTCAATCATTAGCCCCAAATGGAG                        |
| 2852  | CGCGAATTCGGATCCATGGGTTCATCATCATCATCATATGATGAATCGGCTATTTCG     |
| 2853  | GCCGAGCTCGTCGACTCAGTCAGCCGCTGCCCA                             |
| 2867  | GCGAATTCGGATCCATGGGTTCATCATCATCATCATATGGAGGTCAAATTATGGAAC     |
| 2868  | GCCGAGCTCGTCGACTCATGCAACGGTAGCTCGGTG                          |
| 2869  | GCGAATTCGGATCCATGGGTTCATCATCATCATCATCATGAGGTCAAGTTATGGAATG    |
| 2870  | GCCGAGCTCGTCGACTCACAAGCAGCAGCTCTATG                           |
| 2871  | GCGAATTCGGATCCATGGGTTCATCATCATCATCATCATGATTGGCTGGGATTTGAG     |
| 2872  | GCCGAGCTCGTCGACTCATACAGACAACAAACTGGTTCG                       |
| 2883  | CGCGGATCCATGGGTTCATCATCATCATCATACCGTGGATGTGTCGGTTG            |
| 2884  | GCCGTCGACTCATTGCCTGTAGTATCCTCCAC                              |
| 2915  | GCCGAGATCTTCTCAACACAACATATACAAAAC                             |
| 2916  | GCCGGATCCGGCTATCGTTTCGTAATGGTG                                |
| 2984  | GCCGAGCTCGTCGACTCACCAGATCCGATCGAAGGAG                         |
| 2985  | GGCGGATCCATGGGTTCATCATCATCATCATATAGATCTGCTCCTCCTCCGGCGAAG     |
| 2986  | GGCGGATCCATGGGTTCATCATCATCATCATATAGATCTATGCCGCCACCGAATTCC     |
| 2987  | GCCGAGCTCGTCGACTCAACTCGTACTGGGCGGAGG                          |
| 3367  | CGGCTGCAGCTATAACCGCGCCGAGTTAGTAGCGAGTAAGACAGACTC              |
| 3369  | GCGGTCTAGAATAACTCGGCGCGGTTATAGCATGTCGCTTGTGTTGG               |
